# Supplementary material
Source: PubMed Central journal article supplement (PMC9134309)
Supplement: NIHPP2022.04.28.489942V2-supplement-1.pdf [file NIHPP2022.04.28.489942V2-supplement-1.pdf]

**Supplementary Table 1. Human lung donor demographics and experimental assignments.**

| Donor | Gender | Race/<br>Ethnicity | Age | Cause<br>of<br>death | Donation | Comorbidities                                                               | Smoking<br>(>20PY) | Experiment Type                 |
|-------|--------|--------------------|-----|----------------------|----------|-----------------------------------------------------------------------------|--------------------|---------------------------------|
| 1     | M      | White              | 63  | Anoxia               | DBD      | Hypertension,<br>Pulmonary nodules                                          | yes                | BAL                             |
| 2     | F      | White              | 49  | Anoxia               | DCD      | Asthma, COPD,<br>Sepsis pneumonia                                           | yes                | PCLS flow, PCLS imaging         |
| 3     | F      | White              | 37  | Anoxia               | DBD      | None                                                                        | no                 | PCLS flow, PCLS imaging         |
| 4     | M      | White              | 51  | Stroke               | DBD      | Diabetes, CAD,<br>Hypertension                                              | no                 | PCLS flow, PCLS imaging         |
| 5     | M      | White              | 47  | Stroke               | DCD      | None                                                                        | no                 | PCLS flow, PCLS imaging         |
| 6     | M      | Asian/White        | 32  | Head<br>Trauma       | DBD      | Diabetes                                                                    | no                 | PCLS flow                       |
| 7     | F      | Hispanic           | 44  | Stroke               | DBD      | None                                                                        | no                 | PCLS flow, PCLS imaging         |
| 8     | M      | Asian              | 50  | Stroke               | DCD      | Asthma,<br>Hypertension                                                     | no                 | PCLS flow                       |
| 9     | M      | White              | 46  | Suicide              | DCD      | None                                                                        | yes                | PCLS flow                       |
| 10    | F      | Asian              | 56  | Stroke               | DCD      | Hypertension                                                                | no                 | PCLS imaging                    |
| 11    | F      | White              | 57  | Stroke               | DBD      | None                                                                        | no                 | PCLS flow, PCLS imaging         |
| 12    | M      | Hispanic           | 27  | Head<br>Trauma       | DBD      | Asthma                                                                      | no                 | PCLS SCS                        |
| 13    | M      | White              | 43  | Anoxia               | DCD      | None                                                                        | no                 | BAL, PCLS flow, PCLS<br>imaging |
| 14    | F      | Hispanic           | 44  | Stroke               | DBD      | None                                                                        | no                 | PCLS imaging, PCLS SCS          |
| 15    | M      | White              | 43  | Anoxia               | DCD      | None                                                                        | no                 | PCLS flow                       |
| 16    | M      | Hispanic           | 57  | Stroke               | DBD      | None                                                                        | no                 | BAL                             |
| 17    | M      | White              | 50  | Head<br>Trauma       | DCD      | Hypertension                                                                | no                 | BAL                             |
| 18    | M      | White              | 31  | Head<br>Trauma       | DCD      | None                                                                        | no                 | BAL                             |
| 19    | M      | Hispanic           | 50  | Stroke               | DBD      | Hypertension                                                                | no                 | BAL                             |
| 20    | F      | White              | 62  | Head<br>Trauma       | DBD      | Cancer                                                                      | no                 | BAL                             |
| 21    | M      | White              | 27  | Anoxia               | DBD      | None                                                                        | no                 | BAL                             |
| 22    | F      | Hispanic           | 39  | Head<br>trauma       | DBD      | None                                                                        | no                 | BAL                             |
| 23    | F      | White              | 58  | Anoxia               | DCD      | Diabetes,<br>Hypertension                                                   | no                 | BAL                             |
| 24    | F      | White              | 62  | Anoxia               | DCD      | COPD,<br>Hypertension,<br>Hypersensitivity<br>Lung Disease, and<br>diabetes | yes                | BAL                             |
| 25    | M      | White              | 32  | Anoxia               | DCD      | Asthma                                                                      | no                 | BAL                             |
| 26    | M      | Hispanic           | 25  | Anoxia               | DCD      | None                                                                        | no                 | BAL                             |
| 27    | M      | Hispanic           | 33  | Head<br>trauma       | DBD      | Hypertension                                                                | no                 | BAL                             |
| 28    | M      | White              | 33  | Anoxia               | DBD      | Diabetes                                                                    | yes                | BAL                             |
| 29    | M      | White              | 46  | Stroke               | DBD      | Asthma                                                                      | no                 | BAL                             |

DBD: donation after brainstem death

COPD: chronic obstructive pulmonary disease

BAL: bronchoalveolar lavage

PCLS Imaging: precision cut lung slice immunofluorescence imaging

DCD: donation after cardiac death

CAD: coronary artery disease

PCLS flow: precision cut lung slice flow cytometry

SCS: single-cell RNA sequencing

**Supplementary Table 2. Demographic and clinical information for COVID-19 ETA samples.**

| Subject | Age | Gender | Ethnicity                      | ARDS (Y/N)<br>Berlin<br>definition | ETA<br>sampling<br>after<br>intubation<br>(days) | P/F ratio at<br>time of ETT<br>sampling | ICU LOS<br>(days) | Hospital<br>LOS (days) | Death (Y/N) |
|---------|-----|--------|--------------------------------|------------------------------------|--------------------------------------------------|-----------------------------------------|-------------------|------------------------|-------------|
| 1 (1)   | 34  | F      | White                          | Yes                                | 0                                                | 180                                     | 12                | 14                     | No          |
| 2 (365) | 55  | M      | White                          | Yes                                | 40                                               | 110                                     | 35                | 60                     | No          |
| 3 (414) | 58  | M      | Other /<br>Multiple<br>Races   | Yes                                | 1, 3                                             | 165                                     | 19                | 27                     | No          |
| 4 (415) | 62  | F      | Black /<br>African<br>American | Yes                                | 2                                                | 124                                     | 14                | 21                     | No          |
| 5 (419) | 68  | M      | Other /<br>Multiple<br>Races   | Yes                                | 7                                                | 175                                     | 26                | 50                     | No          |
| 6 (476) | 59  | M      | White                          | Yes                                | 12                                               | 160                                     | 44                | 78                     | No          |
| 7 (389) | 66  | F      | White                          | Yes                                | 2                                                | 144                                     | 39                | 55                     | No          |

ARDS: acute respiratory distress syndrome

ETA: endotracheal tube aspirate

P/F ratio: PaO<sub>2</sub>/FiO<sub>2</sub>

ICU LOS: intensive care unit length of stay

Hospital LOS: hospital length of stay

**Supplementary Table 3. Flow cytometry panel for PCLS experiments.**

| <b>Staining</b>               | <b>Antibody (clone)</b> | <b>Lot number</b> | <b>Dye</b> | <b>Catalog number (Supplier)</b> |
|-------------------------------|-------------------------|-------------------|------------|----------------------------------|
| <b>Surface Staining</b>       | CD169                   | 1621398           | AF594      | FAB5197T (R&D Systems)           |
|                               | ACE2                    | BJ07067522        | PE         | bs-1004R (BIOSS)                 |
|                               | EpCAM                   | B250368           | BV650      | 324226 (BioLegend)               |
|                               | CD31 (WM59)             | 8232937           | BV605      | 562855 (BD Biosciences)          |
|                               | CD45 (HI30)             | B333796           | BV421      | 304032 (BioLegend)               |
|                               | CD14 (M5E2)             | B275828           | BV711      | 301838 (BioLegend)               |
|                               | CD3 (SK7)               | 0314461           | BB700      | 566575 (BD Biosciences)          |
|                               | CD19 (SJ25C1)           | 1069967           | BB700      | 566396 (BD Biosciences)          |
|                               | Zombie (viability)      | B331984           | NIR        | 77184 (BioLegend)                |
|                               | HLA-DR (G46-6)          | 1266420           | BUV395     | 564040 (BD Biosciences)          |
| <b>Intracellular Staining</b> | Spike                   | 1619059           | AF647      | FAB105805R (R&D Systems)         |
|                               | dsRNA (J2)              | J2-2007           | AF488      | 10010 (Scicons)                  |

**Supplementary Table 4. Flow cytometry panel for BAL experiments.**

| <b>Staining</b>               | <b>Antibody</b>    | <b>Lot number</b> | <b>Dye</b> | <b>Reference</b>         |
|-------------------------------|--------------------|-------------------|------------|--------------------------|
| <b>Surface Staining</b>       | CD169              | 1621398           | AF594      | FAB5197T (R&D Systems)   |
|                               | ACE2               | BJ07067522        | PE         | bs-1004R (BIOSS)         |
|                               | CD15 (W6D3)        | 1089776           | BV786      | 741013 (BD Biosciences)  |
|                               | CD16 (3G8)         | B321940           | BV605      | 302040 (BioLegend)       |
|                               | CD45 (HI30)        | B333796           | BV421      | 304032 (BioLegend)       |
|                               | CD14 (M5E2)        | B275828           | BV711      | 301838 (BioLegend)       |
|                               | CD3 (SK7)          | 0314461           | BB700      | 566575 (BD Biosciences)  |
|                               | CD19 (SJ25C1)      | 1069967           | BB700      | 566396 (BD Biosciences)  |
|                               | Zombie (viability) | B331984           | NIR        | 77184 (BioLegend)        |
|                               | HLA-DR (G46-6)     | 1266420           | BUV395     | 564040 (BD Biosciences)  |
| <b>Intracellular Staining</b> | Spike              | 1619059           | AF647      | FAB105805R (R&D Systems) |
|                               | IFITM3 (EPR5242)   | GR3416716-1       | AF488      | Ab198559 (Abcam)         |
